# Supplementary material
Source: publisher figshare collection journal article supplement (https://gsapubs.figshare.com/ndownloader/files/22745762)
Supplement: Supplementary file 1 [file 22745762]

## **Observed changes in geyser eruption intervals in Yellowstone following the 2002 Denali fault earthquake**

We monitored eruption intervals of 22 geysers during the winter 2002-2003 by placing temperature sensors in the runoff channels. All instrumented geysers were located at the main Yellowstone geyser basins (Lower, Upper, and West Thumb Geyser Basins) that had been subject to the increase in earthquake activity (Fig. 1). Data were not available from Norris Geyser Basin due to instrument loss. Of these 22 instrumented geysers, 8 displayed notable changes in their eruption intervals, i.e. the changes were larger than the standard error of the intervals prior to the Denali earthquake. Four geysers were too erratic to show any effects, and 10 geysers showed no significant changes.

There was no common pattern in geyser response to the Denali earthquake. But the most obvious examples were Daisy (Fig. 2), Depression, and Riverside geysers in Upper Geyser Basin, which showed a rapid decrease in their eruption interval within hours following the Denali earthquake, recovering close to pre-Denali eruption intervals over subsequent weeks. Castle Geyser in Upper Geyser Basin responded by having an unusually large number of minor eruptions that do not complete the full expected 20 minute water phase and 30-40 minute steam phase. Starting on 8 November there was one week with no minor eruptions followed by two weeks with a large number of minor eruptions. Pink Geyser in Lower Geyser Basin, and Plate and Plume Geysers in Upper Geyser Basin displayed only short-term (few days) irregularities in their eruption behavior lasting for a few days. Lone Pine Geyser in West Thumb Geyser Basin, on the other hand, showed a gradual increase in eruption intervals that peaked three weeks after the Denali earthquake.

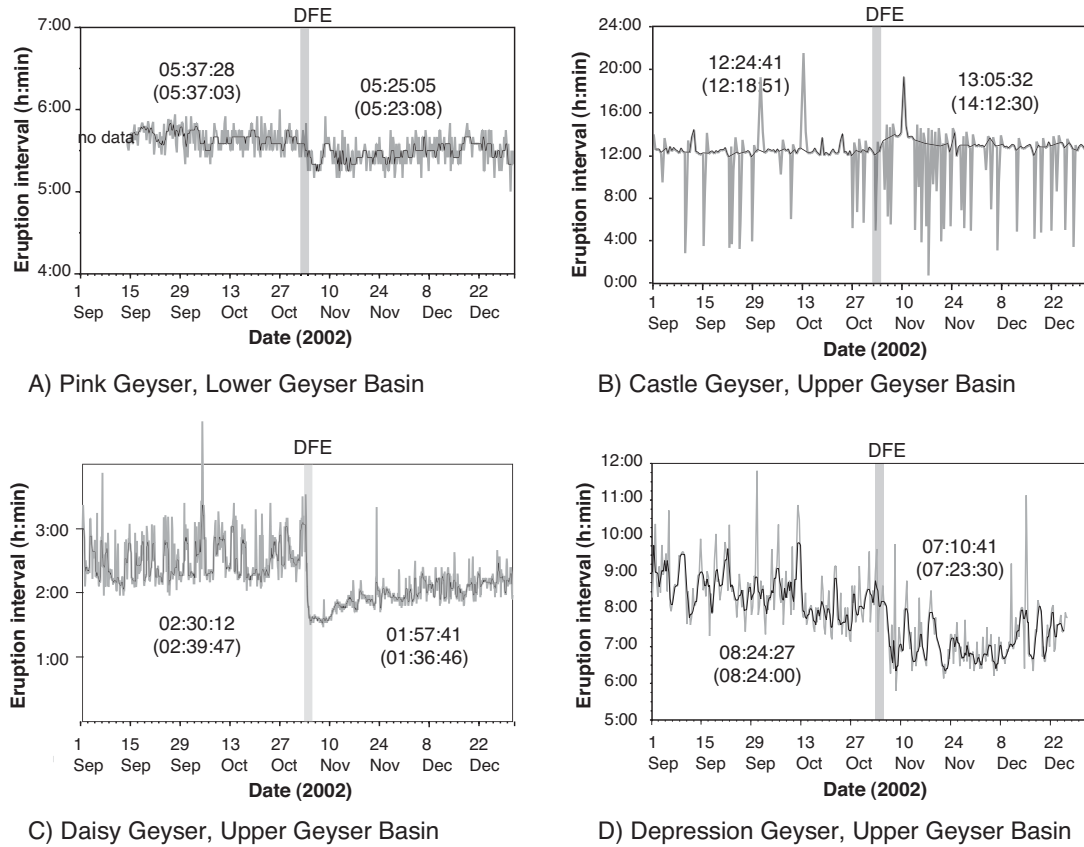

Figure 1. Geyser eruption intervals of Yellowstone between 1 September and 31 December 2003 influenced by Denali fault earthquake (DFE). A, C–H: Gray lines are raw data (individual eruption intervals), and black lines are smoothed data (moving median over several data points). B: Gray line denotes minor eruption intervals, and black line denotes major eruption intervals. Median eruption intervals prior to and after Denali fault earthquake are shown in hour:minute:second (h:min:s) format. Median eruption intervals prior to and after Denali fault earthquake are computed over several weeks and over a few days (in parentheses), respectively. Time of earthquake is marked by bold gray line.

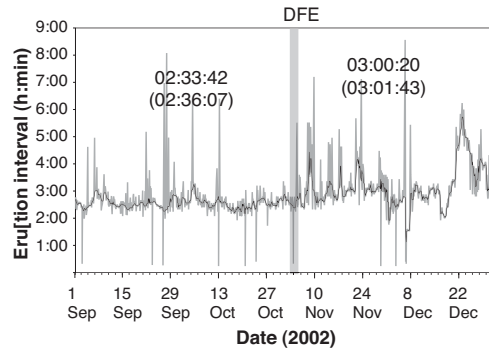

E) Plate Geyser, Upper Geyser Basin

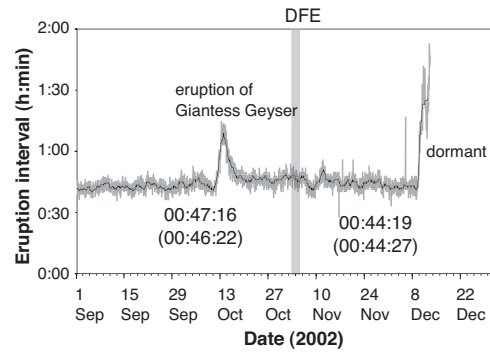

F) Plume Geyser, Upper Geyser Basin

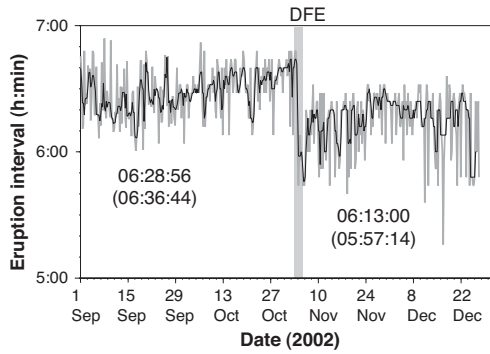

G) Riverside Geyser, Upper Geyser Basin

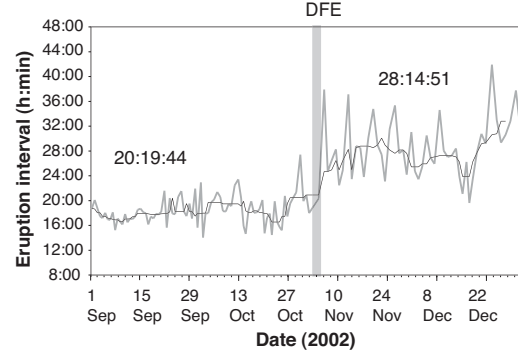

H) Lone Pine Geyser, West Thumb Geyser Basin

Figure 1. continued.

TABLE 1: SHORT-TERM (FEW DAYS) CHANGES IN ERUPTION INTERVALS OF MONITORED GEYSER PRIOR TO AND AFTER THE DENALI FAULT EARTHQUAKE (DFE). A NEGATIVE CHANGE INDICATES THAT ERUPTION INTERVAL DECREASED FOLLOWING THE DENALI FAULT EARTHQUAKE.

|                                | Time<br>period<br>(days) | Mean<br>interval<br>prior to<br>DFE<br>(h:min) | Standard<br>deviation<br>prior to<br>DFE<br>(h:min) | Mean<br>interval<br>after DFE<br>(h:min) | Standard<br>deviation<br>after DFE<br>(h:min) | Change<br>(h:min) | Change<br>(%) |
|--------------------------------|--------------------------|------------------------------------------------|-----------------------------------------------------|------------------------------------------|-----------------------------------------------|-------------------|---------------|
| <u>Norris Geyser Basin</u>     |                          |                                                |                                                     |                                          |                                               |                   |               |
|                                |                          |                                                |                                                     | No data available                        |                                               |                   |               |
| <u>Lower Geyser Basin</u>      |                          |                                                |                                                     |                                          |                                               |                   |               |
| Fountain Geyser                |                          |                                                |                                                     | No changes observed                      |                                               |                   |               |
| Great Fountain Geyser          |                          |                                                |                                                     | No changes observed                      |                                               |                   |               |
| Pink Geyser                    | 5                        | 05:37                                          | 00:08                                               | 05:23                                    | 00:09                                         | -00:14            | -4.0          |
| <u>Upper Geyser Basin</u>      |                          |                                                |                                                     |                                          |                                               |                   |               |
| Boardwalk Geyser               |                          |                                                |                                                     | Inconclusive                             |                                               |                   |               |
| Castle Geyser                  | 10                       | 12:19                                          | 00:14                                               | 14:12                                    | 00:28                                         | +01:53            | +15.0         |
| Daisy Geyser                   | 5                        | 02:40                                          | 00:20                                               | 01:37                                    | 00:05                                         | -01:03            | -39.0         |
| Depression Geyser              | 7                        | 08:24                                          | 00:36                                               | 07:23                                    | 00:42                                         | -01:01            | -12.0         |
| Grand Geyser                   |                          |                                                |                                                     | No changes observed                      |                                               |                   |               |
| Grotto Geyser                  |                          |                                                |                                                     | No changes observed                      |                                               |                   |               |
| Lion Geyser                    |                          |                                                |                                                     | No changes observed                      |                                               |                   |               |
| North Goggle Geyser            |                          |                                                |                                                     | Inconclusive                             |                                               |                   |               |
| Oblong Geyser                  |                          |                                                |                                                     | No changes observed                      |                                               |                   |               |
| Old Faithful Geyser            |                          |                                                |                                                     | No changes observed                      |                                               |                   |               |
| Plate Geyser                   | 7                        | 02:36                                          | 00:13                                               | 03:02                                    | 01:01                                         | +00:26            | +16.0         |
| Plume Geyser                   | 7                        | 00:46                                          | 00:03                                               | 00:44                                    | 00:03                                         | -00:02            | -4.0          |
| Riverside Geyser               | 3                        | 06:37                                          | 00:14                                               | 05:57                                    | 00:12                                         | -00:40            | -10.0         |
| Rift Geyser                    |                          |                                                |                                                     | No changes observed                      |                                               |                   |               |
| West Triplet Geyser            |                          |                                                |                                                     | No changes observed                      |                                               |                   |               |
| <u>West Thumb Geyser Basin</u> |                          |                                                |                                                     |                                          |                                               |                   |               |
| Lone Pine Geyser               | 7                        | 21:04                                          | 03:00                                               | 26:26                                    | 05:41                                         | +05:22            | +26.0         |
| Resurgent Geyser               |                          |                                                |                                                     | No changes observed                      |                                               |                   |               |
| Generic Geyser                 |                          |                                                |                                                     | Inconclusive                             |                                               |                   |               |
| Hillside Geyser                |                          |                                                |                                                     | Inconclusive                             |                                               |                   |               |

TABLE 2: LONG-TERM (SEVERAL DAYS) CHANGES IN ERUPTION INTERVALS OF GEYSER FOR WHICH DATA WAS AVAILABLE PRIOR TO AND AFTER THE DENALI FAULT EARTHQUAKE (DFE). A NEGATIVE CHANGE INDICATES THAT ERUPTION INTERVAL DECREASED FOLLOWING THE DENALI FAULT EARTHQUAKE.

|                       | Time<br>period<br>(days) | Mean<br>interval<br>prior to<br>DFE<br>(h:min) | Standard<br>deviation<br>prior to<br>DFE<br>(h:min) | Mean<br>interval<br>after DFE<br>(h:min) | Standard<br>deviation<br>after DFE<br>(h:min) | Change<br>(h:min) | Change<br>(%) |
|-----------------------|--------------------------|------------------------------------------------|-----------------------------------------------------|------------------------------------------|-----------------------------------------------|-------------------|---------------|
| <u>Norris Geyser</u>  |                          |                                                |                                                     |                                          |                                               |                   |               |
| <u>Basin</u>          |                          |                                                |                                                     |                                          |                                               |                   |               |
| No data available     |                          |                                                |                                                     |                                          |                                               |                   |               |
| <u>Lower Geyser</u>   |                          |                                                |                                                     |                                          |                                               |                   |               |
| <u>Basin</u>          |                          |                                                |                                                     |                                          |                                               |                   |               |
| Fountain Geyser       |                          |                                                |                                                     |                                          |                                               |                   |               |
| No changes observed   |                          |                                                |                                                     |                                          |                                               |                   |               |
| Great Fountain Geyser |                          |                                                |                                                     |                                          |                                               |                   |               |
| No changes observed   |                          |                                                |                                                     |                                          |                                               |                   |               |
| Pink Geyser           | 14                       | 05:37                                          | 00:08                                               | 05:25                                    | 00:09                                         | -00:12            | -4.0          |
| <u>Upper Geyser</u>   |                          |                                                |                                                     |                                          |                                               |                   |               |
| <u>Basin</u>          |                          |                                                |                                                     |                                          |                                               |                   |               |
| Boardwalk Geyser      |                          |                                                |                                                     |                                          |                                               |                   |               |
| Inconclusive          |                          |                                                |                                                     |                                          |                                               |                   |               |
| Castle Geyser         | 58                       | 12:25                                          | 00:25                                               | 13:06                                    | 00:29                                         | +00:41            | +6.0          |
| Daisy Geyser          | 58                       | 02:30                                          | 00:21                                               | 01:58                                    | 00:14                                         | -00:07            | -33.0         |
| Depression Geyser     | 57                       | 08:38                                          | 02:02                                               | 07:56                                    | 02:16                                         | -00:42            | -8.0          |
| Grand Geyser          |                          |                                                |                                                     |                                          |                                               |                   |               |
| No changes observed   |                          |                                                |                                                     |                                          |                                               |                   |               |
| Grotto Geyser         |                          |                                                |                                                     |                                          |                                               |                   |               |
| No changes observed   |                          |                                                |                                                     |                                          |                                               |                   |               |
| Lion Geyser           |                          |                                                |                                                     |                                          |                                               |                   |               |
| No changes observed   |                          |                                                |                                                     |                                          |                                               |                   |               |
| North Goggle Geyser   |                          |                                                |                                                     |                                          |                                               |                   |               |
| Inconclusive          |                          |                                                |                                                     |                                          |                                               |                   |               |
| Oblong Geyser         |                          |                                                |                                                     |                                          |                                               |                   |               |
| No changes observed   |                          |                                                |                                                     |                                          |                                               |                   |               |
| Old Faithful Geyser   |                          |                                                |                                                     |                                          |                                               |                   |               |
| No changes observed   |                          |                                                |                                                     |                                          |                                               |                   |               |
| Plate Geyser          | 33                       | 02:34                                          | 00:28                                               | 03:00                                    | 00:47                                         | +00:26            | +17.0         |
| Plume Geyser          | 31                       | 00:47                                          | 00:06                                               | 00:44                                    | 00:03                                         | -00:03            | -6.0          |
| Riverside Geyser      | 53                       | 06:29                                          | 00:12                                               | 06:13                                    | 00:15                                         | -00:16            | -4.0          |
| Rift Geyser           |                          |                                                |                                                     |                                          |                                               |                   |               |
| No changes observed   |                          |                                                |                                                     |                                          |                                               |                   |               |
| West Triplet Geyser   |                          |                                                |                                                     |                                          |                                               |                   |               |
| No changes observed   |                          |                                                |                                                     |                                          |                                               |                   |               |
| <u>West Thumb</u>     |                          |                                                |                                                     |                                          |                                               |                   |               |
| <u>Geyser Basin</u>   |                          |                                                |                                                     |                                          |                                               |                   |               |
| Lone Pine Geyser      | 62                       | 20:20                                          | 18:48                                               | 28:15                                    | 27:52                                         | +07:55            | +39.0         |
| Resurgent Geyser      |                          |                                                |                                                     |                                          |                                               |                   |               |
| No changes observed   |                          |                                                |                                                     |                                          |                                               |                   |               |
| Generic Geyser        |                          |                                                |                                                     |                                          |                                               |                   |               |
| Inconclusive          |                          |                                                |                                                     |                                          |                                               |                   |               |
| Hillside Geyser       |                          |                                                |                                                     |                                          |                                               |                   |               |
| Inconclusive          |                          |                                                |                                                     |                                          |                                               |                   |               |

## Observed increases in seismicity at major geyser basin following the 2002 Denali earthquake

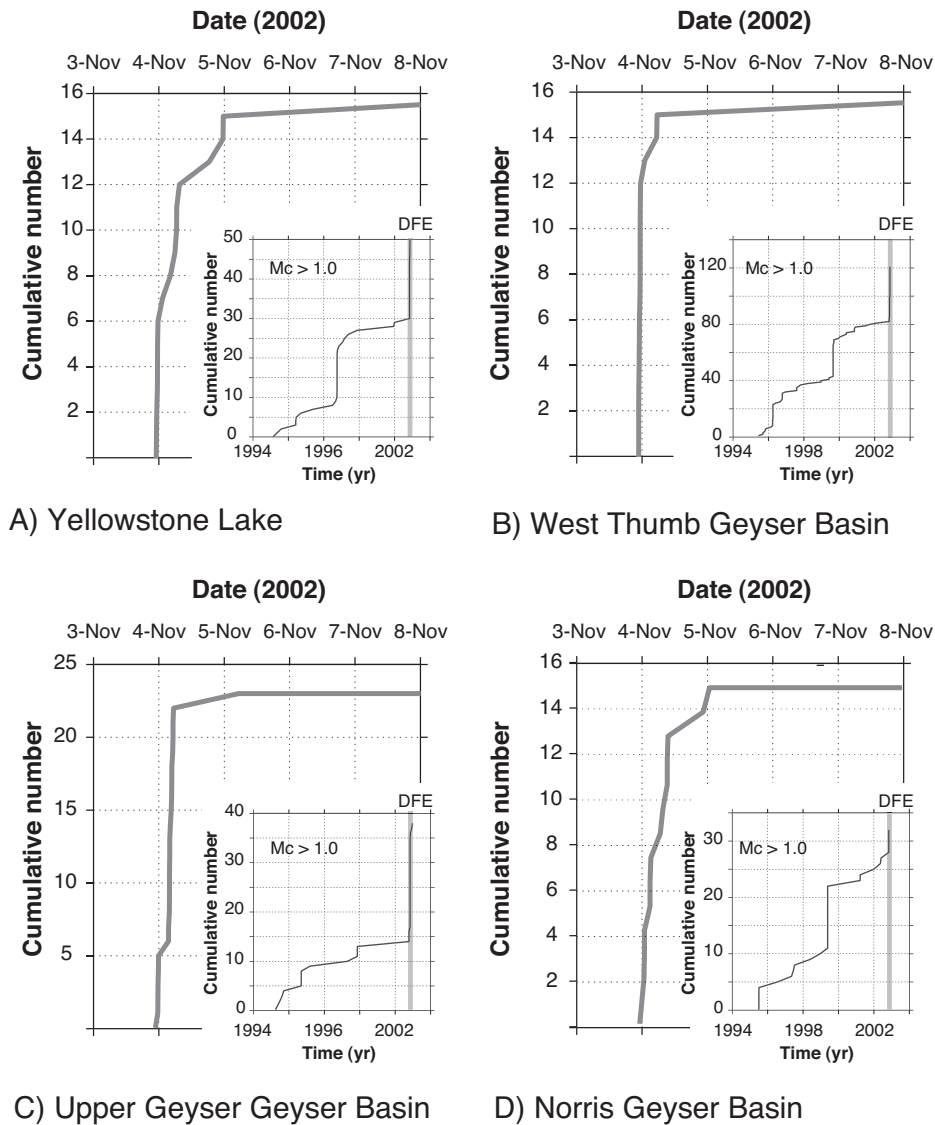

Figure 2. Cumulative number of earthquakes at major geyser basins in Yellowstone following the 2002 Denali earthquake (DFE). A: northern part of Yellowstone Lake, B: West Thumb Geyser Basin, C: Upper Geyser Basin, D: Norris Geyser Basin. Inlay diagrams show cumulative number of earthquakes with magnitude  $> 1.0$  from 1994 to present for each geyser basin. Time of the DFE is indicated by grey line.
